# Supplementary material
Source: Research Square preprint supplement (doi:10.21203/rs.3.rs-8903391/v1)
Supplement: Supplementary file 1 [file f06d368ad2de1afc7c60e7e6.docx]

# Supplementary Table 1. Characteristics of Included Studies (n = 119)

| Title | First Author | Year | Country/ where Study was Carried out | Study Design | Health Profession | Sample Size | Setting | Mental Health Challenges/ Conditions Identified and associated findings | Intervention (Effectiveness, Barriers & Facilitators) |
| --- | --- | --- | --- | --- | --- | --- | --- | --- | --- |
| Addiction to psychoactive substances among resident physicians in Morocco: A multicenter cross-sectional study | Sara Echater | 2024 | Morocco | Multicenter cross-sectional descriptive and analytical study 5 | Resident Doctors (Médecins résidents) 6 | 310 resident physicians 7 | 7 University Hospital Centers (CHUs) in Morocco 8 | 11.9% (n=37) had psychiatric disorders 99, with depressive disorders (43.2%) and anxiety disorders (16.2%) most common10. 3.2% (n=10) had made at least one suicide attempt. SPA use was associated with psychiatric history (27% vs 14.7%; p=0.05) and suicide attempts (40% vs 15.3%; $p=0.06$)12. | N/A (Cross-sectional study) | Barriers: N/A (Not an intervention study) | Facilitators: N/A (Not an intervention study) |
| Psychological support unit design and implementation during COVID-19 pandemic: Case of Mongi Slim Hospital, Tunisia. | Wafa Abdelghaffar | 2021 | Tunisia | Implementation case study | mental health professionals (16 psychiatrists and 7 psychologists) |  | a general hospital with specialized adult and child mental health departments | Impact of Pandemic: Negative psychological and social impact on the population and health professionals.  Healthcare Staff: Stress, fear of infection for self/family, and burnout.  Patients: Anxiety, stress, depression, and relapses in pre-existing mental health disorders | Psychological Support Unit (PSU) comprising:  Free helpline for patients, families, and staff.  Stress management workshops focusing on psychoeducation and coping techniques.  Debriefing sessions for COVID-19 unit teams.  Talk groups led by a work psychologist to handle emotional distress.  Direct consultations, cognitive behavioral therapies, and medication management. | Barriers: Resource Constraints: Volunteer nature of the work (no profit, performed in addition to routine duties) and lack of a dedicated hospital budget.  Logistics: Use of personal phones for the helpline.  Cultural: Significant stigmatization and reluctance to consult or participate in workshops | Facilitators: Organizational Support: Creation of a Hospital Crisis Committee to oversee strategy.  Partnerships: Donation of services from the national telecommunication operator (Tunisie Telecom) for the free helpline.  Flexibility: Conducting workshops within respective hospital departments to increase accessibility |
| Mental Disorders Among Health Care Workers at the Early Phase of COVID-19 Pandemic in Kenya; Findings of an Online Descriptive Survey | Edith Kamaru Kwobah | 2021 | Kenya | Desctiptive online cross sectional study | healthcare workers | 1,259 participants opened the survey; 957 completed at least one component | Public (70.2%) and private (29.8%) healthcare facilities in Kenya, ranging from national referral (Level 6) to dispensaries (Level 2) | Worry: 66% reported worry related to COVID-19, including fear of contracting the disease (71%) and infecting others (65%). Depression: 32.1% prevalence; significantly higher in females, workers <35 years old, and those not married. Generalized Anxiety Disorder (GAD): 36% prevalence; commoner among younger professionals, females, and those with <10 years of experience.   Probable PTSD: 64.7% prevalence.  Insomnia: 24.2% prevalence; higher among younger professionals and those with <10 years of experience. | N/A (Cross-sectional study) | Barriers: N/A (Not an intervention study) | Facilitators: N/A (Not an intervention study) |
| Substance Use among a Sample of Healthcare Workers in Kenya: A Cross-Sectional Study | Aggrey G Mokaya | 2016 | kenya | Cross sectional Study | healthcare workers | 296 | Public healthcare facilities across eight counties in Kenya (Levels 4, 5, and 6) | Substance Use: 51.0% lifetime prevalence and 38.2% current prevalence of any substance use.  Alcohol: Most commonly used substance (29.7% current use). 14.2% of users were in the moderate-to-high risk category.  Other Substances: Current use of tobacco (8.8%), Khat (6.1%), and sedatives/tranquilizers (5.1%).  Associated Findings: Substance use was significantly more common in males. Non-specialist doctors (interns and medical officers) had the highest prevalence of alcohol use at 40%. | N/A (Cross-sectional study) | Barriers: N/A (Not an intervention study) | Facilitators: The study used a convenience sampling method and a relatively small sample size compared to the total population of Kenyan healthcare workers. Potential underreporting due to the sensitive nature of substance use and reliance on self-reporting. Only public facilities were included |
| A comparative study of burnout syndrome among health professionals in a Nigerian teaching hospital | B. O Olley | 2003 | Nigeria | Cross-sectional study | Nurses, doctors, pharmacists and pharmacy technicians, medical social workers and nursing assistants. | 260 | University College Hospital | Burnout and its associated factors. Core findings indicated that nurses consistently reported higher scoreson all m easures of burnout: exhaustion, accomplishment and depersonalization when compared withother health care providers. Significant differences were also noted between nurses and all other care provider, in total scoreson the General Health Questionnaire (F = 6.54, df25R. P < .01) and the State Trait Anxiety Inventory respectively. |  |
| A cross-sectional self-assessment of burnout amongst a sample of doctors in Ghana | Nana K. Ayisi-Boateng | 2019 | Ghana | Cross-sectional study | Physicians | 90 | Kumasi community during a conference. | Burnout, depersonalisation, lack of personal achievement and emotional exhaustion. |  |
| A cross-sectional survey of burnout in a sample of resident physicians in Sudan | Yasir Ahmed Mohammed Elhadi | 2022 | Sudan | Cross-sectional design | Resident Physicians | 208 | Teaching hospitals | Burn out syndrome among resident physicians characterised by Emotional Exhaustion , Depersonalization ,decreased professional accomplishment. A total of 86.1% of participants fulfilled the criteria for burnout in at least one dimension, while 13.9% experienced burnout across all three dimensions. Regarding emotional exhaustion (EE), 70.7% indicated high levels of burnout. Meanwhile, 44.2% reported substantial depersonalization (DP), and 73.1% felt a diminished sense of professional accomplishment (PA). The burnout syndrome was linked to the number of working hours per shift; those who worked over 24 hours showed increased levels of burnout, EE, and DP. In summary, it is imperative for stakeholders to quickly implement effective solutions to safeguard the mental well-being of resident physicians. |  |
| A study of predictors and levels of burnout: The case of proffessional nurses in primary health care. | M.C. Engelbrecht | 2008 | South Africa | Cross-sectional study | Nurses | 543 | Primary care facilities | Burnout. High levels of burnout were identified. Availability of resources, workload and conflict at work explain 21% of the variance in the level of emotional exhaustion reported by the professional nurses. To a large degree, the results indicate that the well-being of professional nurses is significantly affected by chronic work overload and occupational stress. |  |
| Addressing substance abuse among healthcare professionals in a tertiary healthcare facility in Nigeria: a case study of Nnamdi Azikiwe university teaching hospital | Chidindu Prince Anagwu | 2024 (June) | Nigeria (Nnamdi Azikiwe University Teaching Hospital (NAUTH)) | Descriptive cross-sectional study | Healthcare workers: doctors, nurses, lab scientists, radiographers, physiotherapists, pharmacists, ward assistants | 197 respondents | Nnamdi Azikiwe University Teaching Hospital (NAUTH), Nnewi, Anambra State, Nigeria | Stressful/excessive workload (32.0%) and Emotional distress (32.0%) were major factors influencing use. 37.1% were moderate risk and 1% high-risk users of alcohol. | N/A (Cross-sectional study) | Barriers: Need to maintain dignity/respect and stigma may act as barriers to addressing the issue. | Facilitators: N/A (Not explicitly stated) |
| Analysis of the learning climate and burn out associated factors among neurosurgical trainees in Morocco:- A national survery based study. | Mohammed Yassaad Oudrhiri | 2015 | Morocco | Cross-section study | Neurosurgery residents | 44 | Six university hospitals and two neurosurgery departments in level two hospitals. | Burnout, Learning climate. 77.3% were in a burnout state according to the MBI, and nearly half of them (47.7%) were experiencing a low personal achievement state. Although a trend towards a lower personal achievement in young residents was observed (p=0.188), no statistical significance was seen between the two populations or inside the residents’ population. Participants to the survey  responded with low satisfaction rates regarding the work/life balance (18,2%), quality of life (22,7%), working environment (27%), future perspectives (14,9%), and salary (6,8%). The D-rect scores showed a positive feedback throughout the participants, suggesting a favorable learning climate. |  |
| Anxiety and Depression Associated with the Management of COVID-19 Among Healthcare workers in Cameroon | Célestin Pierre Mboua (PhD). | 2021 | Cameron | Quantitative, analytical, and cross-sectional | Nurses (57.5%) , Physicians (25.0%). | 331 | Health facilities (structures sanitaires) and Civil Society Organizations (CSOs) | Anxiety and Depression. Prevalence rates were: Anxiety (41.8%) and Depression (42.8%) the sample had a slight female majority (53%) and was predominantly aged 20-39 years; no conflicts of interest were declared by the authors. |  |
| Anxiety and Stress due to COVID-19 Pandemic and Associated Factors Among Healthcare Workers in West Guji Zone Southern Ethiopia | Zelalem Jabessa Wayessa | 2023 | Ethiopia | Cross-sectional survey. | Healthcare Workers (HCWs). Professions included Nurses (35.6%), Health officers (14.2%), Pharmacy (14.2%), Laboratory (13.8%), Midwifery (13.1%), General practitioner (4.0%), Anesthesia (2.5%), IESO (1.5%), and Others (1.1%). | 275 | Public health facilities in the West Guji Zone, Oromia Region, Southern Ethiopia. | Anxiety and Stress The prevalence of anxiety was 25.5%.The prevalence of stress was 9.1%.The authors conclude that health institutions must focus on the well-being of healthcare workers and provide comprehensive psychological assistance to support their mental well-being by giving different training. |  |
| Anxiety, Stress, and Depression Among Healthcare Professionals During the COVID-19 Pandemic: A Cross-Sectional Study in Morocco | Oumnia Bouaddi | 2023 | Morocco | Descriptive cross-sectional study | Physicians (46.4%) and nurses (53.6%). | 211 | Healthcare facilities in Casablanca and Fez, Morocco | Depression, Anxiety, Stress, and Post-Traumatic Stress Disorder (PTSD). Depression: 53.1% of participants reported symptoms of mild to extremely severe depression. Anxiety: 58.3% experienced mild to extremely severe anxiety. Stress: 55.1% experienced stress. Distress (PTSD): 72.5% of participants experienced mild to severe distress. The study found that being female, a nurse, or a frontline HCW was associated with higher levels of psychological distress. The most common coping mechanisms reported were leisure activities (29%), sport (19%), and drinking tea/coffee (19%) |  |
| Assessing burnout among healthcare professionals in a private hospital in Abuja, Nigeria: Prevalence, Patterns and Implications. | Gadzama N N | 2024 | Nigeria | Cross-sectional study | Healthcare professionals | 100 | Nisa Premier hospital | Burnout: The findings of the study revealed a high prevalence of burnout among healthcare professionals working in a private health facility with the most common type being frenetic which is experienced as a feeling of risking one's health and well-being inorder to attain a classical outcome. This study found no association between age and burnout, females had a high prevalence of burnout and those who were single and had no children were susceptible to burnout. With concerns to occupation nurses had the highest prevalence of burnout |  |
| Assessing COVID-19 related anxiety and functional impairment among nurses in Malawi | Genesis Chorwe Sungani | 2020 | Malawi | Cross-sectional study | Nurses | 102 | Malawi as a country including National Organization of Nurses in Malawi and government health facilities. | The study found that COVID-19 related anxiety was high with a percentage of 25.5% and nearly half of the respondents suffered from functional impairment due to COVID-19 significantly higher among females. COVID-19 related anxiety is one of the mental health challenges affecting nurses whcih significantly reduces the quality of care offered by them. |  |
| Assessment of burnout among resident doctors in Benin city, Edo state ,Nigeria | Esohe Olivia Ogboghodo | 2020 | Nigeria | Cross sectional study | Resident doctors | 423 | Six hospitals | Burnout. A higher proportion (279, 62.3%) of the respondents were males. A total of 267 (59.6%) respondents suffered emotional exhaustion (EE), while depersonalisation and reduced personal accomplishments were suffered amongst 211 (47.1%) and 153 (34.2%), respectively. The overall prevalence of burnout was 41.7%. Long duration of call hours (P < 0.001) and speciality (P = 0.039) were found to be significantly associated  with burnout. |  |
| Behind the scrubs: Psychological distress and resilience among nurses | Jennifer Chipps | 2025 | South Africa | Quantitative descriptive cross-sectional study | Professional registered nurses (52.1%), enrolled nursing auxiliaries (35.2%), and enrolled nurses (11.4%) | 167 | Three hospitals | Moral Distress, Fear of COVID-19. Vulnerability to Disease, Psychological Distress; The study found that enrolled nurses reported significantly higher levels of psychological distress both during the pandemic and in the 30 days prior to the survey. The conclusion highlights the impact of the pandemic on nurses' mental health and emphasizes the need to build resilience. | None. |
| Burnout among mental health professionals: A Tunisian experience | S. Halayem-Dhouib | 2010 | Tunisia | Cross-sectional study | Nursing staff, residents and practitioners | 106 | Hospital | Burnout syndrome. High levels of burnout were detected among nurses. This was true for the emotional tiredness sub-scale (mean score: 26.18); the depersonalization subscale (mean score: 10.20) and for the alteration of personal achievements (mean score: 32.94). High scores in emotional tiredness were correlated to depression (P = 0.000; R = 0.56) and to personal difficulties (P = 0.021; R = 0.31) in this group. Residents showed high scores in personal achievements (mean score: 32.56), and practitioners did not reach the cutoff scores on the Maslach Burnout Inventory. |  |
| Burnout among physicians and nursing staff working in the emergency hospital of Tanta University, Egypt. | S.A.M. Abdo. | 2016 | Egypt | Cross-sectional study | Physicians and nursing staff (nurses, head nurses, resident physicians, demonstrators, and assistant lecturers) | 523 | The emergency hospital | Professional Burnout. The prevalence found was: 66.0% of participants had a moderate level of burnout and 24.9% had high burnout. More than half of nurses (52.8%) experienced high emotional exhaustion compared with 39.7% of physicians. Almost all participants (97.7%) had high levels of reduced personal accomplishment. |  |
| Burnout and Associated Factors among Hospital-Based Nurses in Northern Uganda: A Cross-Sectional Survey. | Samson Udho | 2022 | Uganda | Cross-Sectional Survey | Nurses | 395 | 2 Referrals, 2 General hospitals, and 2 health center levels IV | Burnout. Based on the ProQOL manual guidelines, 49.1% had high levels of burnout , 36.2% eported average levels of burnout ,and 14.7% reported low levels of burnout. Factors associated with burnout were age ,social support, healthy eating, work load and management responsbilities. This paper concluded that half of the nurses in northern uganda experience high levels of burnout |  |
| Burnout and Fear of Contagion as Factors in Aggressive Tendency of Health-Care Workers Treating People with Aids | Oluyinka Akanmu Ojedokun | 2013 | Nigeria | Cross‑sectional study | Medical practioners and Nurses | 242 | Three hospitals | Burnout and perceived fear of contagion. Results showed that perceived fear of AIDS, burnout, and category of staff (medical practitioner or nurse), respectively, were associated with the tendency to perpetrate aggression  against PLWAs. The implication of these findings is that stakeholders in the health-care system in Nigeria and elsewhere should address any aggressive tendency of health workers in public-health settings in order to prevent the occurrence of actual physical aggression against clients. |  |
| Burnout and its associated factors among healthcare workers in COVID-19 isolation centres in Khartoum, Sudan: A cross-sectional study | Esraa S. A. Alfadul | 2023 | Sudan | Cross-sectional survey study | Doctors (41.5%) and nurses (58.5%) | 306 | Five COVID-19 isolation centres | Burnout (measured as exhaustion and disengagement). 45.7% of participants met criteria for high risk of burnout. Paper describes components: emotional exhaustion, reduced feelings of achievement and disengagement; many participants reported emotional exhaustion and being emotionally drained. Associated perceptions: fear of infection (p < 0.001) and dissatisfaction with hospital protective measures (p = 0.002) were associated with burnout.Adaptive behaviours frequency (examples): brief mental breaks (42.2%), exercise (37.6%), spirituality (35.0%), only 13.4% sought professional support (this subgroup had lower burnout). |  |
| Burnout and job satisfaction of nursing staff in a South African acute mental health setting | Anthea Payne | 2020 | South Africa | Cross-sectional study | Nursing staff | 127 | Psychiatric hospital. | Burnout. The study found relatively high personal and work-related burnout but lower client-related burnout. Reported mean scores: personal burnout 49.2 ± 19.95, work-related burnout 45.0 ± 21.90, client-related burnout 26.0 ± 19.49. Total job-satisfaction score mean = 15.5 ± 2.81 (interpreted by authors as “satisfied”). Higher burnout was associated with lower job satisfaction (Pearson r = -0.077, p < 0.01). No significant associations between burnout or job satisfaction and gender, rank or years of experience. Population mostly female (83.5%), mean age 43.46 ± 11.53 years (range 23-63); ranks: professional nurses 59.1%, registered nurses 15.0%, nursing assistants 26.0%; mean total nursing experience 17.1 years, at Stikland 11.5 years; no significant associations between burnout or job satisfaction and gender, rank, or years of experience; higher personal/work-related burnout than previous studies, lower client-related; negative correlation suggests higher burnout linked to lower satisfaction, but satisfaction remains high despite burnout (possibly personal factors drive burnout); recommends preventative/supportive measures or processes to reduce burnout prevalence; suggests qualitative studies to explore reasons for high satisfaction despite burnout, and larger multi-site studies for generalizability. |  |
| Burnout and quality of life among nurses working in selected mental health institutions in South West Nigeria | Morufat A Alabi | 2021 | Nigeria | Cross-sectional descriptive study | Mental Health Nurses | 259 | Neuropsychiatry hospitals | Burnout. Prevalence of emotional exhaustion (EE) was 44.4%, depersonalization (DEP) 31.7% and reduced personal accomplishment was 98.8% preictors were poor funding management, role conflict while predictors of depersonalization were were age group, 31-40 years, male gender, working at more urban city. The mean total quality of life was higher among respondent who had no emotional exhaustion and depersonalization. This study concluded that Burnout is high among mental health nurses and is associated with poor quality of life |  |
| Burnout and resilience at work among health professional serving in tertiary hospitals in Ethiopia | Yared Mulu Gelaw | 2023 | Ethiopia | Cross-sectional study | Health professionals employed in surgical, gynecologic, and obstetric | 388 | Two public teaching hospitals | Burnout and resilience. Burnout syndrome was shown among 101 (26.0%) study participants. 205 (52.8%), 150 (38.7%), and 125 (32.2%) participants presented high emotional exhaustion, high depersonalization, and low personal accomplishment, respectively. Emotional exhaustion was predicted by the participants’ profession, the hope of promotion, professional recognition, and workload. Depersonalization was predicted by age, profession, and perceived workload of the participants. The predictors for personal accomplishment were profession, relationship at work, professional recognition, and having a managerial position in addition to clinical duty. The participants’ mean RaW score was 78.36 (Standard deviation ±17.78). A negative association was found between RaW and emotional exhaustion and depersonalization. In contrast, a positive association was identified between RaW and personal accomplishment. The type of profession and marital status were positive predictors of RaW. |  |
| Burnout in Tunisian medical residents: About 149 cases | A. Ben Zid | 2016 | Tunisia | Cross-sectional study | Medical residents | 149 | Hospitals | Burn out. Among participants,17.14% had a severe burnout. The emergency medicine residents had the highest rate of emotional exhaustion and depersonalization and severe depression. Overall, resident respondents, 31%, had moderate to severe depression. Among stress factors, those significantly correlated to burnout were: lack of hobbies (P < 0.001), bad job conditions (P = 0.031), poor conditions of the workplace (P = 0.046), relationship problems in workplace (P = 0.01), work-family conflicts (P < 0.001). The consequences of occupational stress associated with burnout were: Antecedents of specialty change (P = 0.017) and desire for a specialty change (P < 0.001). A significant correlation between depression and severe burnout was not found. |  |
| Burnout status at work among health care professionals in a tertiary hospital | Asrat Biksegn | 2016 | Southwest Ethiopia | Cross-sectional study | Healthcare workers | 403 | Jimma university teaching hospital | The study aimed to estimate the prevalence of burnout syndrome among health professionals and to analyze some of the work-related risk factors that can trigger burnout. The results showed high prevalence of burnout among health professionals due to the increase in the levels of stress which were arising from ; poor relationship with the managers at work, history of physical illness in the health professional, physical or verbal abuse by patients and teammates and job security and these were highlighted to be the work-related risk factors that could trigger burnout. |  |
| Burnout syndrome (BOS) among resident doctors in an Egyptian tertiary care university hospital: Prevalence and determinants during the COVID-19 pandemic. | Amr A. Fadle | 2022 | Egypt | Cross-sectional study | Doctors | 218 | Hospitals | Burn out syndrome. The median MBI sub-scales (IQ Range) values were 30.0 (20, 39), 21.0 (15, 30), and 29.5 (22, 36) for emotional exhaustion [EE], depersonalization [DP], and personal accomplishment [PA] respectively. About 51.0% and 83.0% of the residents were high in EE and DP, while 8.7% were low in PA. The median EE and DP were higher in younger age (⩽27 years; p=.002 and .024), males (p=.001 and <.001), working >90 hours weekly (p=.016 and <.001), exposure to harassment (p<.001), and having COVID-19 infection (p=.002 and .001). Residents working in surgical departments higher DP scores than those in non-surgical departments (p=.03). There was a mild positive correlation between working hours per week and the total scores in EE and DP, r=.24 (p<.001) and r=.23 (p=.001) respectively, it was found to have a negative correlation with the PA (r=−.133 and p=.044). |  |
| Burnout syndrome among Hospital Healthcare Workers During the COVID-19 in Accra,Ghana | Kennedy Dodam Konlan | 2020 | Ghana | Cross sectional study | Healthcare workers | 870 | Three public hospitals in primary, secondary and tertiary care | Burnout. The prevalence of burnout among the participants was 20.57% with non-clinicians displaying higher burnout compared to clinicians (26.74&% v 15.64%, p< 0.001). Health workers with 1–5 years working experience were 26.81 more likely to experience burnout (AOR = 26.81, CI = 6.37–112.9). Night shifts defined as shifts between 8:00pm to 8:00am was associated with the 1.86 odds of experiencing burnout (OR = 1.86; 95% CI: 1.33–2.61;=p<0.001). Also, participants of the primary level facility were 3.91 times more likely (AOR =3.91, 95% CI = 2.39–6.41) to experience burnout on the job. Similarly, participants with additional jobs were 1.14 times more likely (AOR = 1.14, 95% CI = 0.75–1.74) to experience burnout. In addition, participants harboring intentions of leaving their current jobs were 4.61 times more likely (AOR = 4.61, 95% CI = 2.73–7.78) to experience burnout. Furthermore, participants with perceived high workload were 2.38 times more likely (AOR = 2.38, 95% CI= 1.40–4.05) to experience burnt-out on the job. |  |
| Burnout Syndrome Among Hospital Healthcare Workers During the COVID-19 Pandemic and Civil War: A Cross-Sectional Study | Muhammed Elhadi | 2020 | Libya | Cross-sectional study | Hospital healthcare workers | 532 | Libyan hospitals | Burn out syndrome. 357 (67.1%) reported emotional exhaustion (EE Score ≥ 10), 252 (47.4%) reported depersonalization (DP score ≥ 10), and 121 (22.7%) reported a lower sense of personal accomplishment (PA score ≤ 10). Verbal abuse was experienced by 304 participants (57.1%) and physical abuse in 93 (17.5). Gender was associated with high emotional exhaustion and high depersonalization. Being 35 years or older was associated with high depersonalization. Professional specialty was significantly associated with high emotional exhaustion and depersonalization. Fear of COVID-19 infection was associated with high emotional exhaustion and high depersonalization |  |
| Burnout, compassion fatigue and compassion satisfaction among nurses in the context of maternal and perinatal deaths | Teresa-Anne Bagakilwe Mashego | 2016 | South Africa | Descriptive quantitative cross-sectional study | Nurses | 83 | Hospitals | Burnout, compassion fatigue and satisfaction. The occurrence and intensity of burnout, compassion fatigue, and compassion satisfaction among nurses. A majority of participants (92%) indicated moderate levels of burnout, while approximately 67% reported moderate to high levels of compassion fatigue, and 82% expressed compassion satisfaction. In summary, the results imply that nurses who encounter maternal and perinatal mortality in their care are at a moderate risk for experiencing burnout and compassion fatigue. |  |
| Career satisfaction and burnout among Ghanaian physicians | Samuel T. Opoku | 2014 | Ghana | Cross-sectional study | Physicians | 200 | Hospitals | Burnout. Generally, physicians in Ghana expressed moderate overall career satisfaction. However, they were least satisfied with the availability of resources, their compensation and work-life balance. Overall, burnout was low in the study population; however physicians exhibited moderate levels of emotional exhaustion. Career satisfaction was negatively associated with the burnout dimensions of depersonalization, emotional exhaustion and low personal accomplishment. |  |
| Caring for the carers: A psychosocial support model for healthcare workers during a pandemic | Idah Moyo | 2023 | Zimbabwe | descriptive observational study | Healthcare workers | Stress, burnout, psychological implications of COVID-19 | Psychosocial Support ModelDevelopment of a model based on Donabedian’s framework (Structure, Process, Outcome) to support HCWs during pandemics. | Model validation by experts | Model Developed: Proposed as a reference guide to provide an enabling and supportive environment. |
| Coping with depression and anxiety in Egyptian physicians during COVID-19 pandemic | Ola Osama Khalaf | 2020 | Egypt | Cross sectional study | Physicians | 170 | Governmental general hospitals | Depression, stress, and coping. The majority (63%) suffered from severe or extremely severe depression, 77.6% had extremely severe anxiety, and 72% suffered from stress. BRCS showed that only 17.1% had high resilient coping. Female physicians had significantly higher depression, anxiety, and stress scores of DASS than male physicians (p = 0.001, < 0.001, and < 0.001, respectively). The anxiety scale was significantly higher in those with chronic diseases (p = 0.040) while the stress scale was lower significantly in those with higher academic degree (p= 0.034). Age had a significantly negative correlation with DASS anxiety (p = 0.031) and stress scores (p = 0.037).The BRCS score had a significantly negative correlation with the depression, anxiety, and stress scales of DASS (p =0.018, 0.014, and 0.007 respectively. |  |
| Depression and eating disorders among health care professionals in Morocco during the COVID-19 pandemic | Laila Lahlou | 2022 | Morocco | Cross-sectional study | Medical doctors, nurses, and medical students. The sample consisted of 59% medical students, 15.2% general practitioners, 11.3% medical specialists, 8.2% nurses, and 6.2% other health professionals. | 389 | Morocco, via an online survey distributed through social media to groups of healthcare professionals | Depression and Eating Disorders. The study found that rates of both depression and eating disorders had increased among healthcare workers compared to the pre-pandemic period. Factors associated with depression included being female and older age. Factors associated with eating disorders included younger age, obesity, cannabis use, emotional eating, and a diagnosis of depression | None. |
| Depression, anxiety and coping mechanisms among mental healthcare practitioners during COVID-19. | Yolandi Stals. | 2024 | South Africa | Cross-sectional survey. | Psychiatrists, psychologists, occupational therapists, social workers and nursing staff | 212 | Three private mental-health hospitalsand one public facility | Depression, Anxiety and Stress.High levels of depression: 28.3% (DASS-21 depression ≥14). High levels of anxiety: 40.6% (DASS-21 anxiety ≥10). Stress: associations reported between stress severity and depression/anxiety. Depression, anxiety and coping. Mental healthcare practitioners, especially nurses, experienced significant COVID-19-related psychological distress. Avoidant coping mechanisms (including self-blame, behavioural disengagement, substance use, denial, self-distraction, and venting) were found to be dysfunctional and maladaptive, increasing the risk of anxiety and depression, and significantly predicting both depression and anxiety. The authors conclude that interventions should focus on replacing these avoidant styles with more adaptive approach coping strategies. |  |
| Determinants of burnout among nurses and midwives at a tertiary hospital in Ghana: A cross-sectional study | Douglas Aninng Opoku | 2022 | Ghana | Cross-sectional study | Nurses and midwives | 384 | Tertiary hospital | Burnout. The majority of the study participants experienced low burnout for all dimensions (58% in emotional exhaustion, 55.5% poor personal accomplishment and 38.3% depersonalization). Multiple regression analysis revealed that high emotional exhaustion was independently predicted by post-graduate education, lack of support from management, dislike for leadership style, and inadequate number of staff. Age, lack of support from  management, and inadequate number of staff independently predicted high depersonalisation. Female sex and years of practice independently predicted low personal accomplishment. |  |
| Developing a healthcare worker psychological preparedness support programme for the COVID-19 outbreak | Zukiswa Zingela | 2022 | South Africa | Intervention development and pilot study (pre-test/post-test design) | Healthcare workers (including psychiatrists, registrars, nurses, and medical officers) | 30 (Pilot group) | Tertiary academic and hospital settings in Gqeberha and Mthatha, South Africa | Anxiety and Fear: Significant psychological distress, fear of infection, and anxiety regarding the COVID-19 pandemic. Psychological Distress: Initial screening showed varying levels of distress, which the program aimed to mitigate. | Healthcare Worker Psychological Preparedness (HWPP) support programme. This was a multi-phase intervention: 1) Preparation (sensitisation and training), 2) Active (6-week online support and workshops), and 3) Maintenance (peer-led support). | Barriers: Lack of access to smart devices or data for some lower-level staff; poor internet connectivity; and high workload/time constraints during the pandemic surge. | Facilitators: Use of digital platforms (Zoom/WhatsApp) for remote access; institutional support from university and hospital management; and the use of a "train-the-trainer" model for peer support. |
| Effects of music therapy on occupational stress and burn-out risk of operating room staff | I. Kacem | 2020 | Tunisia | Pragmatic quasi-experimental study with pre-post measures | Operating room staff including surgeons, anesthetist doctors, technicians, nurses, instrumentalists, and caregivers | 34 (final population after exclusions) | Operating theatre of urology and maxillofacial surgery at Sahloul Academic Hospital, Sousse, Tunisia | Occupational Stress: 41.2% reported high perceived stress initially. Post-intervention, Perceived Stress Scale (PSS-10) scores significantly decreased from 22.0 to 16.0 (p=0.006). Burnout: High levels identified in emotional exhaustion (38.2%) and depersonalization (50%). Post-intervention, emotional exhaustion scores decreased significantly (p=0.004), though other dimensions did not. | Music therapy program involving daily 30-minute sessions using a varied repertoire of oriental, occidental, and Tunisian music. | Barriers: High attrition rate (26%) due to erratic schedules. Patient-related incidents required shifting intervention sessions. | Facilitators: Varied musical repertoire to satisfy participant preferences. Use of mobile technology to strictly monitor volume levels below 60 dB to prevent noise pollution. |
| Efficacy of a brief online mindfulness-based intervention on the psychological well-being of health care professionals and trainees during the COVID-19 pandemic: A mixed method design. | Iram Osman. | 2021 | South Africa | Mixed methods design | Medical doctors and trainees (46%), psychologists (16%), physiotherapists (14%), occupational therapists (14%), and other allied health care workers (10%, including a podiatrist, chiropractor, and two radiographers). Medical trainees included five medical interns and one final year medical student. | 47 | Private practice and government hospitals | Stress and burnout (including chronic emotional exhaustion, cynicism, and a lack of personal accomplishment). Loss of control and a sense of powerlessness because of COVID-19, including COVID-19 and the anxiety around it, concern for the safety of self and others, and a sense of being emotionally overwhelmed. Participants also reported fear, helplessness, guilt, heightened anxiety, feeling emotionally overwhelmed because of limited resources, an invalidating work environment, and exposure to an increasing number of deaths. The study found a statistically significant (p < 0.05) reduction in stress levels and emotional exhaustion as well as an increase in mindful awareness and feelings of personal accomplishment after the intervention. The participants’ shared experiences were analysed in two parts. The pre-intervention analysis presented with central themes of loss of control and a sense of powerlessness because of COVID-19. The post-intervention analysis comprised themes of a sense of acquired control and empowerment through increased mindfulness. No significant correlations were found between participants of different genders, ages, cultures or years of experience with regards to their levels of stress, burnout or trait mindfulness. Ethical approval was obtained from the Humanities and Social Science Research Ethics Committee (HSSREC/00000848/2019) of a large South African university. | Brief online mindfulness-based intervention (MBI), adapted from a 4-week mindfulness-based programme compiled by a clinical psychologist and mindfulness teacher. It consisted of four 1-h group sessions conducted via the collaborative cloud-based video conferencing platform Zoom by two qualified and experienced mindfulness teachers. Sessions included exercises such as raisin exercise, body scan, 3-min breathing space, awareness of breath, yoga, walking meditation, awareness of thoughts, loving kindness meditation, and input on topics like autopilot, mindfulness, breath and body awareness, stress, acceptance, allowing and letting be, empathy, compassion and self-care. | Barriers: Attrition / dropout: 28% dropout (65 signed up but 47 completed assessments); authors attribute this to erratic work schedules, long hours and pandemic pressures. Recruitment & sampling bias: Purposive snowball sampling via social media (WhatsApp, Facebook)which led to potential selection bias and limits to representativeness. Small sample / low power: Authors note sample size limited ability to detect correlations between mindfulness/stress/burnout and demographic factors. Scheduling constraints despite mitigation attempts: Two make-up classes offered but some participants still could not attend. |
| Exploration of Mental Health and Well-Being of Healthcare Professionals During the COVID-19 Pandemic | Taurzhan K. Aldabergenova | 2024 | Nigeria | Qualitative study using an inductive methodology and a phenomenological approach | Doctors and nurses | 14 | Two teaching hospitals in Ekiti State | Stress and related mental health challenges.This qualitative study aimed to gain a deep understanding of the experiences of doctors and nurses during the COVID-19 pandemic in Nigeria. It highlights the need for a secure working environment and better support systems for healthcare professionals | None. |
| Exploring burnout among psychiatric trainees at a South African university | Tejil Morar | 2018 | South Africa | Cross- sectional study | Psychiatric trainees | 55 | Department ofPsychiatry at the University of the Witwatersrand (WITS),South Africa. | Burn out. There is evidence of some degree of burnout in more than two-thirds of participants. Associated factors lie largely at an organisational level, and while optimisingindividual resilience is important, systemic support plays a key role. |  |
| Exploring factors affecting nurse anxiety in Northwest Ethiopia: a multicenter study | Adane Misganaw | 2024 | Ethiopia | Cross-sectional study | Professional Nurses | 746 | Five comprehensive specialized hospitals | Anxiety (prevalence was 33.9%) , Depression (13.39%) , and Work-related Stress (14.89%). Factors significantly associated with anxiety were: being female (AOR=1.53) , working in an emergency department (AOR=3.65) , working night duty shifts (AOR=3.12) , having conflict with coworkers (AOR=1.70) , and having poor social support (AOR=2.13). The overall prevalence of anxiety was 33.90%. The data collection was done using a structured interviewer-administered questionnaire. |  |
| Exploring psychological distress among psychiatric nurses in Tunisia | H. Khiari | 2024 | Tunisia | Cross-sectional, descriptive, and analytical study | Nurses | 55 | Psychiatry hospital | Psychological distress among psychiatric nurses and to identify the socio-demographic and clinical factors associated with it. The findings stated In terms of working conditions, 81.8% were engaged in shift work. Additionally, 45.5% reported having witnessed a suicide attempt in the course of their employment, while 74.5% experienced aggression, predominantly from patients at 82.5%. Sixty percent indicated a wish to transfer. Moderate to very severe levels of depression, anxiety, and stress were reported in 34.5%, 61.8%, and 36.4% of cases, respectively. A significant correlation was identified between stress levels in psychiatry nurses and their personal somatic history. No further connections were established between depression, anxiety, stress, and other clinical factors. These findings underline the challenging working conditions in psychiatric environments, highlighting the urgent need for targeted interventions to enhance the mental health and well-being of psychiatric nurses. |  |
| Factors associated with recognition at work among nurses and the impact of recognition at work on health-related quality of life, job satisfaction and psychological health: a single-centre, cross-sectional study in Morocco | Latifa Alahiane | 2019 | Morocco | Cross-sectional study | Nurses | 223 | University hospital centre | Psychological health. Significant correlations were found between recognition from superiors and gender, mental health specialisation and normal work schedule. Recognition from superiors is important in maintaining nurses’ psychological health, HRQOL and job satisfaction. |  |
| Features of residency training and psychological distress among residents in a Nigerian teaching hospital | O Esan | 2006 | Nigeria | Cross-sectional study | Residents | 250 | Teaching hospital. | Psychological distress. There was evidence of psychological distress in 48.4% of the respondents, and there was a significant association between psychological distress and the intensity of work (p<0.01). |  |
| Frontline Nurses' Post-Traumatic Stress Disorder and Associated Predictive Factors During the Second Wave of COVID-19 in Central, Uganda | Amir Kabunga | 2021 | Uganda | Cross-sectional study | Frontline nurses | 601 | Two referral and seven general hospitals in central Uganda, which were reception and care centers for COVID-19 patients | Post-Traumatic Stress Disorder (PTSD). The study identified several predictive factors for PTSD among the nurses: lack of social support, fear of getting infected with COVID-19, and increased workload. The authors highlight the significant impact of the pandemic on the mental health of nurses in a healthcare system that was already under severe strain before COVID-19 | None. |
| Gender dynamics and post-traumatic stress disorder in healthcare professionals: Insights from the COVID-19 vaccination | Nour El Houda Benkaddour | 2025 | Morocco | Cross-sectional descriptive and analytical study | Medical and paramedical staff), including nurses (53.0% of females, 42.9% of males), physicians (29.8% of females, 42.9% of males), and health technicians (17.2% of females, 14.3% of males). | 221 | Morocco's Oriental region | Post-Traumatic Stress Disorder (PTSD), Anxiety, and Stress. Females constituted 68.3% of the sample. The study found strong correlations between PTSD, anxiety, and perceived stress among females. It highlights an indirect effect of gender on PTSD, which is mediated by anxiety and moderated by perceived stress, particularly in high-stress contexts. | None. |
| Health anxiety to COVID-19 virus infection and its relationship to quality of life in a sample of health care workers in Egypt: a cross-sectional study | Mohamed Abdelghani | 2020 | Egypt | Cross-sectional study | Healthcare workers | 218 | Three public hospitals | Health anxiety. The frequency of health anxiety to COVID-19 virus among HCWs was 28%. Symptoms of depression, hostility, phobia and somatization, and history of chronic medical illnesses showed greater odds of health anxiety to COVID-19 virus (OR: 6.7, 9.1, 7.3, 7.7, and 12.6, respectively). Being physicians and the increased  number of sleeping hours were less likely associated with health anxiety to COVID-19 virus (OR: 0.1 and 0.5, respectively). Health anxiety to COVID-19 virus was inversely correlated with all domains of QOL among HCWs. |  |
| How Excessive Workloads and Long Hours of Work Contribute to Occupational Stress and Burnout Among Clinical Officers at Public Hospitals in Malawi | Paliani Chinguwo | 2022 | Malawi | Qualitative explanatory research design | Clinical officers | 152 | Four district hospitals and one central hospital. | Burnout and occupational stress. This paper argues, firstly, that before the COVID-19 pandemic, COs experienced OS and burnout due to excessive workloads and long hours of work at public hospitals. Secondly, the COVID-19 pandemic aggravated the problem of excessive workloads and long hours of work at public hospitals. Thirdly, OS and burnout among COs are associated with various impacts that can be categorised as psychological consequences and physical consequences. The psychological and physical consequences of OS and burnout are manifestations of poor quality of life among COs, which ultimately negatively affects public health. Finally, this paper recommends formulating and implementing comprehensive occupational safety and health (OSH) policies at public hospitals. |  |
| Impact of burnout on depression among nurses at a private hospital in Johannesburg, South Africa | Ongeziwe Dyasi | 2024 | South Africa | Cross-sectional study | Nurses | 112 | Private hospital | Emotional exhaustion and depersonalisation. Emotional exhaustion (p = 0.001) and depersonalisation (p = 0.001) were significantly associated with depression. Work experience (p = 0.001) and depersonalisation (p = 0.002) had an impact on depression. |  |
| Impacts of Nursing Work Environment on Turnover Intentions: The Mediating Role of Burnout in Ghana | Collins Atta Poku | 2022 | Ghana | Descriptive cross-sectional design | Registered Nurses | 232 | Municipal and Regional Hospitals | Burnout (including emotional exhaustion, depersonalization, and personal accomplishment). The majority of RNs had a positive perception of their work environment, but a greater number of them had turnover intentions. Burnout was found to completely mediate the relationship between nurse-physician relation and turnover intention. Burnout partially mediated the relationship between Nurse Manager's Leadership Styles and turnover intention. Burnout partially mediated the relationship between Nursing Foundation for Quality Care and turnover intention. The relationship between staffing and resource adequacy and turnover intention was fully mediated by burnout. |  |
| Implementation of a National Workplace Wellness Program for Health Workers in Botswana | Jenny H. Ledikwe | 2017 | Botswana | a cross-sectional survey design (descriptive observational study) | Health workers | Occupational stress, HIV/AIDS related stress | National Workplace Wellness Program (WWP)Components: Health screening, health promotion, stress management, occupational health, psychosocial care, therapeutic recreation. | Level of implementation, Barriers and Facilitators | Varied Implementation: Health screening/promotion more frequent than psychosocial services. |
| Improving Healthcare Worker Resilience and Well-Being During COVID-19 Using a Self-Directed E-Learning Intervention | Frances Kelly | 2021 | South Africa | mixed-methods descriptive study | Healthcare workers (Medical practitioners, etc.) | Burnout, depression, anxiety, insomnia | Self-Directed E-Learning Intervention5 modules delivered online (asynchronous). Focus on stress management, mindfulness, and self-care plans. | Knowledge/Confidence scores, CD-RISC (Resilience), WHO-5 (Well-being) | Significant Increases: Knowledge, confidence, resilience-building behaviors, resilience scores, and well-being scores. |
| Inadequate preparedness for response to COVID-19 is associated with stress and burnout among healthcare workers in Ghana | Patience A. Afulani | 2021 | Ghana | Cross-sectional observational survey | Nurses, midwives and medical/physician assistants, doctors, medical laboratory professionals, disease control officers, nutritionists and other allied health care workers | 823 | Healthcare facilities, including teaching hospitals (26.3%), regional/district hospitals (28.7%), health centers/other government facilities (30.2%), and private/mission facilities (14.7%) | Stress (average score 16.3, with 64.3% moderate stress and 4.3% high stress); burnout (average score 37.4, with 46.9% low burnout and 20% high burnout; high physical fatigue (33.3%), high emotional exhaustion (14.9%), high cognitive weariness (23.2%)) |  |
| Investigating workplace bullying (WPB), intention to quit and depression among nurses in the Upper West Region of Ghana | Emmanuel Dapilah | 2024 | Ghana | Cross- sectional study | Nurses | 323 | Five public hospitals | Depression, Intention to quit, Workplace bullying. Initial descriptive statistics indicate that 64.4% (n=203) of the nurses had intentions of quitting the job while 52.1% (n=164) were depressed at various degrees based on scores on the DASS-21. Further analysis shows a positive linear relationship between WPB and intentions to quit. WPB was also correlated positively with depression among the nurses. This implies that an increased incidence of bullying at work is associated with increased intention to quit and  depression among the nurses. |  |
| Is mental health contagious? Depression, anxiety, stress and burnout among Mental health professionals in Sudan | Iyas Abdelhadi Ahmed Abdelhadi | 2025 | Sudan | Descriptive cross-sectional study | Psychiatrists (registrars, specialists, and consultants), Psychologists, Nurses, Social workers, and General practitioners of psychiatry. The most represented were Psychiatric registrars (45.1%) and Psychologists (16.5%). | 164 | Five major psychiatric hospitals in Khartoum state, Sudan | Depression, Anxiety, Stress, and Burnout. The study found that age and experience were negatively associated with depression, anxiety, and work-related burnout. Higher scores for depression, anxiety, and stress were all significantly correlated with higher degrees of burnout. Approximately one-third of participants felt disheartened by society's perception of their profession and had considered quitting. | None. |
| Job conditions, job satisfaction, somatic complaints and burnout among East African nurses. | Margot van der Doef | 2012 | Kenya, Tanzania and Uganda | Cross-sectional survey design | Nurses | 309 | Public and private hospitals. | Burnout: Nearly one-third of the sample (32.1%) would be labelled as burned out. emotional exhaustion and depersonalisation. 33.9% were labelled as 'very highly' emotionally exhausted, and an additional 31.6% as 'highly' emotionally exhausted. 13.5% were labelled as 'very highly' depersonalised, and an additional 17.7% as 'highly' depersonalised.   Somatic Complaints: The nurses showed high levels of somatic complaints compared to a female general population norm.    9.9% of the sample experienced 'very high' levels of somatic complaints, and an additional 27.7% experienced 'high' levels. |  |
| Job distress and burnout among Tanzanian and Sudanese health professionals: a comparative study | Abdalla AM Hamid | 2022 | Sudan and Tanzania | Cross-sectional study | Nurses and physicians | 144 | Hospitals | Distress, nonpsychotic psychiatric disorders, and burnout. Nonpsychotic psychiatric disorders were more prevalent among Tanzanian health professionals compared to their Sudanese counterparts. T-test results revealed that Tanzanian health professionals experienced significantly higher levels of distress, somatic symptoms, depression, and social dysfunction than their Sudanese counterparts. ANOVA and MANOVA results indicated significant demographic differences in distress and burnout between health professionals from both countries. In addition, Sudanese participants reported higher levels of emotional exhaustion and lower personal accomplishment, while Tanzanians reported higher levels of depersonalisation |  |
| Levels of Burnout and Its Determinant Factors Among Nurses in Private Hospitals of Addis Ababa, Ethiopia, Ethiopia, 2020. A Multi Central Institutional Based Cross Sectional Study | Dejen Getaneh Feleke | 2022 | Ethiopia | Cross- sectional study | Nurses | 368 | Ten private hospitals in Addis Ababa | Burn out. Two hundred seven (56.5%) of them reported suffering from a high level of burnout. In the multivariate logistic regression analysis, night duty shift [AOR = 2.699; 95%CI: (1.043–6.987)], excessive workload [AOR = 6.013; 95% CI: (3.016–11.989)], staff shortage [AOR = 6.198; 95% CI: (3.162–12.147)], persistent interpersonal conflict [AOR = 2.465; 95% CI: (1.225–4.961)], and nurses’ poor health status [AOR =3.4878; 95% CI: (1.815–8.282)] demonstrated a statistical significant association with the professional burnout. |  |
| Levels of occupational stress in doctors working in a South African public-sector hospital | L S Thomas | 2006 | South Africa | cross-sectional and descriptive Study | Doctors | 50 | Public-sector hospital | Stress. The physicians in the hospital exhibited below-average job satisfaction scores, suggesting that their work had lost its sense of fulfillment. Additionally, the doctors reported a perception of diminished mental health, reflecting lowered self-esteem and morale. The findings indicate that physicians in this public hospital experience higher levels of occupational stress compared to the general working population. It was found out that internal medicine department was the most stressed department while surgery and polyclinic was the least stressed department among the different department .The primary sources of stress identified included inadequate staffing, insufficient resources, limited control over their work, challenging schedules, lack of security, and poor opportunities for career development and compensation. |  |
| Mental health and lifestyle in mental health nurses: a cross-sectional, nation-wide study from Uganda during COVID-19 times | Davy Vancampfort | 2022 | Uganda | Cross- sectional study | Mental health Nurses | 108 | 8 regional referral hospitals | Psychological Distress and Post-Traumatic Stress Disorder (PTSD) symptoms. Psychological Distress: 92.6% of participants had psychological distress (Kessler-6 score ≥13). PTSD Symptoms: 44.4% had elevated PTSD symptoms (PCL-5 score ≥41) |  |
| Mental health of healthcare professionals during the early stage of the COVID-19 pandemic in Ethiopia | Yimenu Yitayih | 2020 | Ethiopia | Cross sectional study | Health care professionals | 249 | Hospitals | Psychological distress. The prevalence of psychological distress among healthcare professionals was 78.3%. The mean IES-R score was 34.2(s.d. = 19.4). The ISI score indicated that the prevalence of insomnia was 50.2%. Higher psychological distress was associated with younger age, having insomnia, not having a daily update on COVID-19, and feeling stigmatised and rejected in the neighbourhood because of hospital work |  |
| Mental health of surgeons during the COVID-19 pandemic: An urgent need for intervention | Muhammed Elhadi | 2021 | Libya | Online anonymous cross-sectional survey | Surgeons | 309 | Libyan hospitals | Anxiety symptoms. Depressive symptoms . A great number of abuse episodes (physical and verbal) were demonstrated among surgical staff in Libya. 11.7% of participants reached the cutoff score for depressive symptoms, and 15.2% reached the cutoff score for anxiety symptoms. |  |
| Mental Stress, Anxiety and Depressive Symptoms and Interleuken-6 Level among Healthcare Workers during the COVID-19 Pandemic | Shaimaa A. A. M. Amer | 2021 | Egypt | Comparative Cross-sectional study | Health care workers | 80 | University Hospital | Mental Stress, Anxiety and Depressive symptoms and Interleuken-6 Level. IL-6 levels were high in 81.2% (65) of HCWs compared to 36% (45) of controls (P<.05). The DASS score was higher in participants with high IL-6 levels (>3 ng/mL) than in those with mild to moderate levels (P<.05). The regression model revealed that the type of work as a healthcare staff, irregular or night shift, and stress were predictors of increased IL-6 levels among the studied sample (P<.05) (odds ratio=20.30, 2.44, and 2.04, respectively). |  |
| Mitigation of mental health effects of COVID-19 pandemic among healthcare workers in Western Kenya | Z. Maingi | 2022 | Kenya | Cross sectional study descriptive study | Healthcare workers | Depression, mental health problems | Mitigation Strategies (Survey)Investigation of measures adopted by HCWs (diet, physical activities) in line with Ministry of Health guidelines. | Prevalence of depression, use of mitigation strategies | Adoption Rates: 80.1% consumed healthy diet; 43.3% engaged in physical activities. |
| Nurses’ burnout and its associated factors in Tigray Region, North Ethiopia: | Woldegebriel Gebregziabher Kahsay | 2024 | Ethiopia | Cross-sectional study | Nurses | 634 | General hospitals | Burnout in terms of exhaustion, depersonalization and reduced personal accomplishment in their job. The proportion of burnout among the nurses was 41.10%. The 18.10%, 16.10% and 26% of nurses were with high emotional exhaustion, depersonalization and reduced levels of personal accomplishment respectively. The 5–9 years of work experience, working in a surgical unit, and working night shifts were protective factors. |  |
| Nurses’ work-related stress and associatedfactors in governmental hospitals in Harar,Eastern Ethiopia | Yohannes Baye | 2020 | Eastern Ethiopia | Cross-sectional study | Nurses | 398 | Four government hospitals in Harar | The study showed that the prevalence of work-related stress was 66.2% which was high. This was linked to the shortage of nurses increasing the workload per nurse, working units where those working in intensive careunits were found to experience more stress than others, rotating shifts and presence of any chronic illness where those with a chronic illness were found to be more stressed than others. |  |
| Occupational burnout among doctors at Mankweng and Pietersburg hospitals, Limpopo province | Hlayisani V. Mamorobel | 2023 | south Africa | Cross-sectional study | Doctors | 150 | Two tertiary academic public hospitals | Occupational burnout, defined per the three Maslach dimensions: emotional exhaustion (EE), depersonalisation (DP) and reduced personal accomplishment (PA). The authors concluded a 36% prevalence (EE and/or DP high) described as lower-middle range compared with other South African and international reports, but cautioned interpretation because of definitional heterogeneity across studies. No statistically significant associations were found between burnout and demographic covariates (gender, age, marital status, rank, hours worked, overtime, clinical department), though the authors note subgroup sizes may have limited detection of differences. |  |
| Occupational exposure to maternal death: Psychological outcomes and coping methods used by midwives working in rural areas | Rhoda Suubi Muliira, | 2014 | Uganda | Descriptive cross-sectional quantitative study | Midwives | 238 | Community, rural Districts of Mityana and Mubende. | Death anxiety,Death obsession, death depression and Emotional distress. The overwhelming majority of participants (94%) reported having witnessed a maternal death. Findings from the Death Distress Scale indicated that a significant number of midwives who experienced a maternal death exhibited moderate to high levels of death anxiety (93%), mild to moderate levels of death obsession (71%), and mild levels of death depression (53%). A majority of midwives managed their distress through various coping strategies, including active coping, venting, positive reframing, self-distraction, and planning. In conclusion, it is essential for midwifery educational programs and workplaces to recognize the significance of maternal death from the perspectives of midwives and their capacity to cope with this challenging experience. |  |
| Occupational stress and burnout among South African medical practitioners | Karl Peltzer | 2003 | South Africa | Cross-sectional study | Doctors | 402 | Hospitals | Stress. High severity job stress ratings included (1) fellow workers not doing their job, (2) inadequate salary and (3) covering work for another employee and high frequency of job stress. |  |
| Occupational stressors experienced by healthcare professionals in the course of the COVID 19 crisis | Alma U. Zamurayeva | 2024 | Nigeria | Qualitative analysis | Doctors, nurses, and medical laboratory technicians | 9 | University teaching hospital | Occupational stress. The main causes of stress were workload, policy changes, and extended use of personal protective gear. The study found high levels of occupational stress among HCPs, with workload being the main cause. The impact of the disease outbreak crisis on HCPs' lives and work demands was observed, with occupational demands categorized into safety risk at work and public perceptions. |  |
| Patterns of Substance Abuse Among Health Care Professionals in Selected Hospitals in Asaba, Delta State, Nigeria |  | 2024 | Nigeria | Cross sectional study | Health care professionals | 400 | 3 Hospitals |  |  |
| Perceived stigma among Tunisian health care workers during Covid 19 pandemic | M. Turki | 2020 | Tunisia | Cross sectional study | Health care workers | 250 | University hospitals, private and public health establishments | Stigmatization, psychological and emotional trauma. The mean stigma score was 18.6 ± 8. Participants sometimes to often experienced stigma in their relationships with friends (22%), neighbors (27.2%), parents (22,4%), and in social activities (30.8%). This stigma was perceived mainly through avoidance (68.4%), and rarely through verbal (6%) or physical aggression (1.2%). The mean MSPSS total score was 5.26 ± 1.24. In multivariate analysis, depression history (P < 0.001), long working experience (P < 0.001), having presented ageusia/anosmia (P = 0.007) and lower total social support scale (P < 0.001) were significantly associated with higher perceived stigma score. |  |
| Perceived Stress Among Nurses in Public Hospitals of the Northern Region of Morocco and Its Correlation with Their Social Anxiety: A Cross-Sectional Study | Aya Rahoui Chairi | 2025 | Morocco | Cros-sectional study | Nurses | 494 | 17 hospitals, divided into 4 specialty hospitals and 13 provincial or regional hospitals. | Stress. The study findings showed that 87% of nurses experienced moderate levels of perceived stress, with a mean score of 28.14 ± 6.02. In terms of social anxiety, a mean score of 53.17 ± 21.10 was noted. Risk factors associated with stress levels included gender (t = -2.951; P = 0.003), age (F = 3.466; P = 0.032) and nursing specialty (F = 2.909; P = 0.021). A moderate positive correlation was observed between perceived stress and social anxiety (r = 0.350, P = 0.001) with 12.2% of the variance in social anxiety can be explained by perceived stress (R2 = 0.122) | Barriers: None |
| Post-traumatic Stress Disorder Symptoms and Its Predictors Among Healthcare Workers Following COVID-19 Pandemic in Southern Ethiopia: A Cross-Sectional Study | Mohammed Ayalew | 2022 | Ethopia | Cross-sectional study | Health professions included: physicians (88; 22.7%), nurses (197; 50.9%), and other professionals (102; 26.4%) .“other” included public health officers, laboratory staff, midwives, pharmacists. | 387 | Hospital-based survey in the four named public hospitals | Post-traumatic Stress Disorder symptoms . Prevalence of PTSD symptoms (IES-R ≥ 24) = 56.8%.Severity levels included Severe (36.7%), Moderate (7.8%), and Mild (12.9%) levels of PTSD symptoms. |  |
| Predictors of burnout among midwives working at public hospitals in northwest Ethiopia, 2022: A multi-centred study | Berihun Agegn Mengistie | 2022 | Ethiopia | Cross-sectional study | Mid wives | 640 | Public hospitals | Burn out. The overall prevalence of midwives’ burnout was 55.3 % . The prevalence of personal, work-related, and client-related burnout was 58.3 %, 60.3 %, and 55.5 %, respectively. Factors that were significantly associated with burnout includes workplace violence, not receiving training, being exposed to blood and body fluids or needle stick injuries, low superior support, working in tertiary hospitals, and job rotation of six months or less. The prevalence of burnout among midwives was significantly high. Addressingburnout requires implementing effective burnout prevention measures including enhancing management support, offering professional training, creating a conducive working environment, and adhering to standard precautions. |  |
| Predictors of Death Anxiety Among Midwives Who have Experienced Maternal Death Situations at Work | Rhoda Suubi Muliira | 2014 | Uganda | Exploratory Descriptive cross sectional Study | Midwives | 224 | Community, rural districts of Mubende and Mityana. | Death anxiety. This study revealed that majority of participants (74.6%) reported experiencing moderate to high levels of death anxiety. The factors influencing death anxiety included: having observed two or more maternal deaths in the last two years, being responsible for four or more maternal deaths, a deficiency in professional training for managing death scenarios, and employing coping strategies such as planning, active coping, and acceptance in response to maternal death situations. Repeated exposure to maternal death situations correlates with heightened death anxiety among midwives operating in rural areas. The study concluded that employers must provide intentional support to help midwives manage their death anxiety effectively while at work. |  |
| Predictors of Generalized Anxiety Disorder(GAD) among health care providers during the COVID–19 pandemic at a regional teaching and referral hospital in Western Kenya | Jared Makori Bund | 2024 | Kenya | Cross-sectional study | Health care providers | 202 | Teaching and Referral Hospital | Generalized anxiety disorder. The overall prevalence of anxiety symptoms was 59.9%. Some of the aspects that reduced the risk of GAD were; being a younger HCP (OR 0.11, P = 0.004), fewer years of experience (OR 0.09, P = 0.008), availability of workplace precautionary measures (OR 0.06, P = 0.004), lower income level (OR = 0.04, P = 0.014), living alone (OR = 0.02, P = 0.008) and permanent employment terms (OR = 0.0001, P<0.0001). On the other hand, insufficient state of personal protective equipment (PPEs) (OR= 10.64, P = 0.033), having a family member as a COVID-19 contact (OR = 11.24, P =0.023) and facing COVID-19 related stigma (OR = 8.06, P = 0.001) significantly increased the odds of GAD. The study result is a call to prioritize the health care providers’ psychological well-being by putting in place measures to preserve and enhance their resilience in order to ensure they work optimally and sustain service delivery during a pandemic. |  |
| Predictors of psychological well-being of nurses in Alexandria Egypt | Mostafa Arafa | 2003 | Egypt | cross-sectional study | Nurses | 412 | Five hospitals in Alexandria | Results revealed that 21.67% of nurses recorded moderate to severe psychological symptoms. Fewer years of experience, negative family and friend support, and negative total work satisfaction were found to be significant predictors of psychological ill health among nurses in a descending rank order. Other factors implicated include among others; younger age of the nurses, university nurse graduates and work in ICU, Internal medicine and operating theatres and thsoe working on alternating shifts which is highly stressful and has a negative mental health impact. |  |
| Prevalence and associated factors of burnouter syndrome among selected health care professionals at University Hospitals of Sidama Region and Southern, Ethiopia 2023 | Bereket Bizuneh. | 2023 | Ethiopia | Cross-sectional study. | Nurses, Midwives, Physicians, and Laboratory technologists | 362 | Institution based. | Burnout Syndrome (BOS). BOS is a psychological syndrome characterized by three dimensions: Emotional Exhaustion (EE), Depersonalization (DP), and Low Personal Accomplishment (PA). The overall prevalence of burnout syndrome was found to be 54.7%. |  |
| Prevalence and correlates of alcohol use, mental disorders, and awareness and utilization of support services among healthcare professionals in West Rand District, Gauteng, South Africa: a cross-sectional study | Charlotte Mc Magh | 2025 | South Africa | Quantitative cross-sectional study | Doctors (interns, community service, medical officers, registrars, specialists), nurses (nursing professionals, assistants, professional nurses), clinical associates, and dentists | 330 | Three randomly selected government hospitals and three community healthcare centres in West Rand District, Gauteng, South Africa | Risky Alcohol Use: 20.9% prevalence; males were significantly more likely to report use than females. Anxiety: 47.3% grouped prevalence (mild to severe); female professionals were 3 times more likely to be affected. Probable Depression: 13.6% prevalence; females were 5 times more likely to be classified with probable depression. Suicide Symptoms: 7.9% prevalence. COVID Dysfunctional Anxiety: 4.8% prevalence. |  |
| Prevalence and determinant factors of mental health problems among healthcare professionals during COVID-19 pandemic in southern Ethiopia: multicentre cross-sectional study | Mohammed Ayalew | 2021 | Ethiopia | Multi-centre cross-sectional study | Physicians (22.7%), nurses (50.9%), and other professionals such as public health officers, laboratory staff, midwives, and pharmacists (26.4%). | 387 | Randomly selected public hospitals in Sidama, southern Ethiopia | Depression, Anxiety, and Stress. The most common sources of fear and anxiety reported by participants were lack of access to personal protective equipment (78.8%) and fear of taking the infection home to their family (63.8%). Significant risk factors for mental health problems included being female, married, living alone, and being a nurse. | None. |
| Prevalence and determinants of depression, anxiety and burnout among Egyptian house officers during Covid-19 pandemic | Asmaa Sayed | 2020 | Egypt | Cross sectional study | House officers | 174 | Teaching hospitals | Depression, anxiety and burnout. Anxiety, burnout, and depression were reported among 35%, 32%, and 22% of participants, respectively. Multivariate regression analysis found that higher levels of overall worry were associated with anxiety, but not depression or burnout. Having a good personal protective equipment attitude was a significant predictor of both anxiety and burnout. Participants with depression had a higher likelihood of also having a burnout, but a lower likelihood of having anxiety. Overall worry related to the pandemic, depression, and clinical burnout status were all significantly associated with anxiety. |  |
| Prevalence and determinants of depression, anxiety and stress among psychiatric nurses in Ghana: a cross-sectional study | Sampson Opoku Agyemang | 2022 | Ghana | Cross-sectional survey. | Psychiatric Nurses | 311 | Three public psychiatric hospitals. | Depression, Anxiety, and Stress. The study found that 19.6% of psychiatric nurses experienced mild to severe depression, 27% mild to severe anxiety, and 42% mild to high stress. |  |
| Prevalence and factors associated with burnoutamong junior medical doctors at a South African tertiary public sector hospital | Malebo Kgatle | 2024 | South Africa | Cross-sectional study | Medical interns | 101 | Hospital | Burnout. 95% of the participants reported burnout. Statistically significant factors contributing towards burnout were lack of resources and poor relations with support staff and senior staff. The medical rotation that was reported by the participants to contribute most towards their burnout was internal medicine. |  |
| Prevalence and predictors of depression, anxiety and stress among frontline healthcare workers at COVID-19 isolation sites in Gaborone, Botswana | Keatlaretse Siamisang | 2021 | Botswana | Cross-sectional study | Healthcare professionals | 385 | 6 Isolation facilities | Depression, anxiety and stress. Depression, anxiety and stress were detected in 94 (21.0% (95% CI 17.3–25.1%)), 126 (28.2% (CI 24.1– 32.6%)) and 71 (15.9% (12.6–19.6%)) of the participants respectively. Depression was associated with smoking (AOR 2.39 (95% CI 1.23–4.67)), working at the largest COVID-19 isolation centre, Sir Ketumile Masire Teaching Hospital (SKMTH) (AOR 0.25 (95% CI 0.15–0.43)) and experience of stigma (AOR 1.68 (95% CI 1.01–2.81)). Tertiary education (AOR 1.82 (95% CI 1.07–3.07)), SKMTH (AOR 0.49 (95% CI 0.31–0.77)), household members with chronic lung or heart disease (AOR 2.05 (95% CI 1.20–3.50)) and losing relatives or friends to COVID-19 (AOR 1.72 (95% CI 1.10–2.70)) were predictors of anxiety. Finally, predictors of stress were smoking (AOR 3.20 (95% CI 1.42–7.39)), household members with chronic heart or lung disease (AOR 2.44 (95% CI 1.27–4.69)), losing relatives or friends to COVID-19 (AOR 1.90 (1.05–3.43)) and working at SKMTH (AOR 0.24 (0.12–0.49)) |  |
| Prevalence of anxiety and depressive symptoms among medical residents in Tunisia | Mehdi Marzouk | 2018 | Tunisia | Cross-sectional survey study | Medical residents | 1700 | Faculty of Medicine of Tunis | The study revealed that 43.6% of these medical residents met the definite criteria for anxiety and 30.5% for depression. Higher scores in the anxiety-depression scale were significantly associated with older age,female sex and the heavy burden of work imposed on aweekly or monthly basis, as reflected by the high numberof weekly working hours, the number of night shifts per month and the choice of a specialty with higher workload. Resident physicians share the same known causes of depression with the general population: physicalhealth, lifestyle, marital status, history of depression,childhood issues, religiosity and others.The occurrence of depression should be considered as a major event in young physicians’ career or even life. It has been shown that once present, depression as well as burnout (another consequence of work-related chronic stress) may persist throughout the duration of residency or even beyond |  |
| Prevalence of burnout among nurses working at a psychiatric hospital in the Western Cape | Anathi F. Tununu | 2019 | South Africa | Quantitative descriptive survey design | Nurses | 198 | Psychiatric hospital in Western Cape | Burnout: The results of the study revealed that morethan half of the respondents had low levels of emotional exhaustion, morethan three quarters were in the low category for depersonalization and nearly three quarters scored high on personal accomplishments and all of them didnot meet the criteria for burnout. The low levels of burnout maybe due to the age of the participants for the average age was 41.7years which was high,higher number of female participants compared to males for male gender, nursi is a predictor of burnout, bursing rank for professional seniority contributes to high levels of burnout, high number of years of experience. In summary, the nurses working in the psychiatric hospital in Western Cape South Africa donot experience burnout. |  |
| Prevalence of burnout and associated factors among nurses working in public hospitals, southern Ethiopia: a multi-center embedded mixed study | Amelework Gonfa Efa | 2022 | Ethiopia | Mixed Methods | Nurses | 374 | Public Hospitals | Burn out. The prevalence of burnout among nurses was 49.2% . Nurses working in primary hospitals, night shifts, poor work satisfaction, alcohol drinking, poor social support, anxiety and depression were significantly associated with burnout. Resource- reward disparities, poor social support and suboptimal work environments are the qualitative study findings which supplement the quantitative data. |  |
| Prevalence of burnout and its correlation with resilience among healthcare professionals in Morocco | H. Guider | 2023 | Morocco | Cross-sectional study | Healthcare professionals | 158 | Three institutions in the Casablanca-Settat region, Morocco | Burnout Syndrome, including its components: Emotional Exhaustion (EE): 43.7% prevalence Depersonalization (DP): 44.9% prevalence Diminished Professional Accomplishment (PA): 58.2% prevalence The study also identified reduced levels of resilience in 44.3% of participants. The study found statistically significant correlations between resilience and all three dimensions of burnout. This correlation was noted to vary by gender. | None. |
| Prevalence of depression among health workers in Enugu, South East Nigeria | IE Obi | 2015 | Nigeria | Cross-sectional descriptive survey | Doctors (32.0%), nurses (45.6%), medical laboratory scientists (8.1%), physiotherapists (4.9%), pharmacists (9.1%), others (0.3%) | 309 | Two tertiary teaching hospitals | Depressive symptoms identified: 46/309 (14.9%) of workers met the study’s cut-off for depression.Females had higher prevalence than males (females 18.0% vs males 8.7%; difference statistically significant). 47% having low burnout and 20% high burnout. About 33%, 15%, and 23%, respectively, had high values for physical exhaustion,emotional exhaustion, and cognitive weariness. The study emphasizes depression's impact on job performance and productivity in a sensitive profession like healthcare, with recommendations for further research on determinants and effects in the Nigerian health workforce; sample demographics include mean age 33.3 ± 8.7 years (range 22-59), majority 20-29 years (41.7%), female (66.3%), married (49.0%), 1-5 years of service (56.0%), Christian (99.4%), and Igbo (98.7%); no significant associations with age or marital status, but gender difference was significant (P=0.028); sadness over conditions was significantly more common in depressed workers (P=0.007). In my analysis, the study's focus on tertiary-level workers limits generalizability to primary/secondary care; small subgroups (e.g., widowed n=9, older age n=23) reduce statistical power for some comparisons; reliance on Zung scale as a screening tool (not diagnostic) means reported prevalence indicates symptoms rather than confirmed clinical depression, potentially overestimating true burden without follow-up interviews; the high female representation (66.3%) aligns with nursing dominance but may skew gender findings; overall, it provides a baseline for mental health in Nigerian health workers, highlighting need for workplace interventions given expressed sadness over working conditions. |  |
| Psychological and physiological stress and burnout among maternity providers in a rural county in Kenya: individual and situational predictors. | Patience A. Afulani | 2021 | Kenya | Mixed method study | Maternity providers | 101 | Rural county | Stress and burnout. 85% of providers reported moderate stress and 11.5% high stress. 65% experienced low burnout and 19.6% high burnout. Average HRV (measured as the root mean square of differences in intervals between successive heart beats: RMSSD) was 60.5 (SD = 33.0) and mean cortisol was mean cortisol was 44.2 pg/mg (SD =60.88). Greater satisfaction with life accomplishments was associated with reduced stress (β = − 2.83; CI = -5.47;− 0.18), while motivation to work excessively (over commitment) was associated with both increased stress (β = 0.61CI: 0.19, 1.03) and burnout (β = 2.05, CI = 0.91, 3.19). Female providers had higher burnout scores compared to male providers. Support staff had higher HRV than other providers and providers under 30 years of age had higher HRV than those 30 and above. Although no association between cortisol and any predictor was statistically significant, the direction of associations was consistent with those found for stress and burnout. |  |
| Psychological distress among Egyptian physicians during COVID-19 pandemic | Radwa Sehsah | 2021 | Egypt | Observational descriptive cross-sectional study | Physicians | 714 | Egypt | Psychological distress.Approximately 50% of doctors exhibited severe psychological distress. Among the physicians studied, the primary factors associated with this distress included being female, having a pre-existing medical condition, caring for an elderly family member, and being in direct contact with an infected individual. The most significant source of concern for these physicians was the fear for the well-being and safety of their families and themselves, while the most effective coping mechanism identified was religious coping. In conclusion, during the ongoing pandemic, Egyptian physicians report a high rate of psychological distress. Female physicians with previous health issues, those with less experience, and frontline workers are at a greater risk of experiencing severe psychological distress. |  |
| Psychological distress among health care professionals of the three COVID-19 most affected Regions in Cameroon:Prevalence and associated factors | Franc¸ois Roger Ngue´py Keubo | 2020 | Cameroon | Cross sectional study | Health care professionals | 292 | Community | Anxiety and depression. The prevalence of symptoms of anxiety ranging from mild to severe and those of depression were 42.20% and 43.50% respectively. Anxiety symptoms were associated with the age of the participants (P = 0.006), fear of contamination (P = 0.019), fear of death (P = 0.000), and depressive symptoms associated to the fear of death (P = 0.000) |  |
| Psychological distress among primary healthcare workers during COVID-19 pandemic: a cross-sectional study in Mansoura, Egypt | Shymaa Mamdouh Mohamed Abdu | 2022 | Egypt | Cros-sectional study | Primary health care workers | 415 | Primary Health Care | Psychological distress levels. More than half (53.3%) of PHC workers had high psychological distress. Multiple logistic regression showed that the significant predictors of high distress level were Para-medical PHC staff (AOR=1.6; 95% CI 1.0–2.6), smoking (AOR=3.6; 95% CI 1.4–9.5), having or suspected corona infection (AOR=3.4; 95% CI 1.5–7.8), afraid from contracting corona (AOR=7.4; 95% CI 3.6–15.3), worry about family (AOR=2.6; 95% CI 1.0–6.9), worry at the beginning of the pandemic (AOR=4.1; 95% CI 2.1–8.4), non-practice of sport (AOR=1.8; 95% CI 1.1–2.9), and non-training to deal with corona cases (AOR=1.9; 95% CI 1.1–3.3). |  |
| Psychological distress among South African healthcare workers during the COVID-19 Pandemic | Shandir Ramlagan | 2023 | South Africa | Cross-sectional study | Healthcare workers | 7607 | Across South Africa | Psychological distress: The study revealed that 50.3% of the nurses, 40.6% of medical practitioners and 47.4% of other healthcare professionals were classified as pyschologically distressed and this was linked to a younger age less than 40years for those above were less likely to be pyschologically distressed, those with specialized qualifications, those with high personal risk perception, being a female, working in an urban area, not having 21days of leave and life insurance not covering COVID-19 whereas availability of well-being support services proved to lower distress levels. This finding was of great concern as pyschological distress among healthcare workers in South Africa during the COVID-19 pandemic seemed exceptionally high as the lives of the frontline healthworkers were put at risk and therefore there is need to protect them and continuously assess their pyschological state to ensure sustainability of the workforce. |  |
| Psychological distress and associated factors among healthcare professionals in Ethiopia during the COVID-19 pandemic: a cross-sectional study | Demeke Demilew | 2022 | Ethiopia | Cross-sectional study | Physicians, nurses, midwives, laboratory technologists, pharmacists, and anaesthesia professionals. | 391 | University of Gondar Comprehensive Specialized Hospital | Psychological Distress (Depression, Anxiety, and Stress): The study found a high prevalence of depression, anxiety, and stress among healthcare workers. Factors significantly associated with depression included being aged 35-44, unmarried status, higher educational levels, being an anaesthesia professional, and having a known medical illness. Unmarried status and being an anaesthesia professional were also linked to anxiety and stress. | None. |
| Psychological distress and PTSD among clinicians in Roma, Lesotho during the COVID-19 pandemic | Muila Kambulandu | 2024 | Lesotho | Cross-sectional study | Clinical staff | 101 | Hospital and associated health centres (clinics) | Psychological distress and PTSD. Of the 101 participants, 42 (41.6%) scored ≥ 24 on the K-10 scale (95% CI: 32.0% – 51.2%) indicating moderate to severe psychological distress and 32 (31.7%) scored ≥ 50 on the PCL-C checklist suggesting severe PTSD (95% CI: 24.5% – 42.9%). High scores on the K-10  were found more among men than women (17 [37.8%] vs. 4 [7.1%]; p ≤ 0.001). Post-traumatic stress disorder was more in the younger age group (p ≤ 0.03), in those reporting anxiety (p = 0.005) and those with more co-morbidities (p ≤ 0.001). | None |
| Psychological distress symptoms among healthcare professionals are significantly influenced by psychosocial work context, Ethiopia: A cross-sectional analysis | Gebisa Guyasa Kabito | 2019 | Ethiopia | Cross-sectional study | Healthcare professionals | 422 | Community based | Psychological distress. Work-related psychological distress symptoms in the past 4weeks stood at 44.4%. Being female worker, high job demand and low job control were significant factors of psychological distress. |  |
| Psychological distress, anxiety , depression and associated factors among Nigerian health workers during Covid-19 pandemic : A cross section study | Olanrewaju Ibikunle Ibigbami | 2022 | Nigeria | Cross sectional study | Health workers | 434 | Tertiary hospitals | Psychological distress, anxiety,depression and other related factors. The prevalence of moderate and severe psychological distress was 49.1% and 5.8%, respectively. Individuals who had the first degree had significantly lower odds (AOR: 0.43; p = 0.037) of experiencing psychological distress while being a nurse (AOR: 2.03; p =0.014), higher levels of anxiety (1.28; p < 0.001), and depression (AOR: 1.17; p = 0.005) were associated with significantly higher odds of experiencing moderate to severe levels ofpsychological distress. |  |
| Psychological impact of COVID-19 on health workers in Ghana: A multicentre, cross-sectional study | Anthony Amanfo Ofori | 2021 | Ghana | Cross-sectional study | Health workers | 272 | Three hospitals | Psychological impact. Over 40% of respondents had fear while 21.1%, 27.8% and 8.2% had depression, anxiety and stress, respectively. Positive attitudes from colleagues and the government’s tax-free salary relief were some factors said to reduce the psychological effects while over half of participants indicated praying more often as a coping strategy. There is a need for the health system to recognize the presence of these adverse psychological effects in health workers and take pragmatic steps to address them |  |
| Psychological Impact of the COVID-19 Pandemic on Health Workers in Morocco: Results of a Cross Sectional Survey. | Bouchra Oneib | 2021 | Morocco | Cross-sectional observational survey | Physicians 80.1 % (general practitioners, specialists, emergency physicians, resuscitators of occupational physicians) and nurses 19.9% | 85 | Health structures including hospitals, diagnostic centers and primarily the public sector. Included front-line roles such as COVID-19 units, emergency rooms, triage, and awareness campaigns. | High perceived stress (67%), probable depression/low well-being (49.4%), sleep disorders (47% during pandemic vs. 31.7% before, including sleep-onset insomnia), PTSD symptoms (16.5% with intrusive thoughts/nightmares, 6% avoidance, 11.7% detachment), anxiety (associated with fears and negative emotions), exhaustion (55.3%), isolation (37.6%), stigmatization (40%), fear of infection (71.1%), fear of transmitting to relatives (97.6%), negative emotions (e.g., sadness, stress from colleague contamination in 70.5%), increased substance use (11.7%), and physical symptoms like fatigue (16.47%), weight changes, eczema, and digestive issues. |  |
| Psychosocial work enviromnent and oxidative stress among nurses | Eman A. Salem | 2016 | Egypt | Cross sectional study | Nursing staff | 204 | Two tertiary hospitals | Stress. ERI was prevalent among the study participants ( 72.5% ). ERI was more prevalent among young married nurses who worked more than 10 years. Nurses that worked at ICUs complained more of ERI (43.2%) while nurses that worked at operation rooms complained more of overcommitment (62.5%). MDA levels were significantly positively correlated with E/R ratios (rho = 0.350, P 0.001).Effort-reward imbalance(ERI) |  |
| Relating Workaholism to Job Stress: Serial Mediating Role of Job Satisfaction and Psychological Capital of Nurses in Angola | Rosa Lutete Geremias. | 2025 | Angola | Quantitative, descriptive-correlational cross-sectional survey | Nurses. | 340 | Public and private healthcare institutions | Job stress The paper situates job stress as related to mental-health problems (e.g., anxiety/depression/burnout) in the literature. This study addresses a significant literature gap by examining stress mechanisms in Angolan nurses, where prior research focused on training challenges and commitment rather than mediators like job satisfaction and psychological capital. All hypotheses were supported: workaholism positively relates to job stress (H1), with mediation by job satisfaction (H2), psychological capital (H3), and serially by both (H4). Psychological capital treated as a second-order construct for robustness. Findings emphasize the need for healthcare leaders to prioritize well-being initiatives. Model fit was good (e.g., TLI=0.953, CFI=0.961, RMSEA=0.057). No conflicts of interest; funded by the author. “The expectation was to reach 600 nurses… However, 340 questionnaires were received, indicating an estimated acceptance rate of 57%… |  |
| Risk factors of professional burnout for nurses, health technicians and midwives at the beni mellal regional hospital, Morocco | R. Ilham | 2022 | Morocco | Cross-sectional study | Nurses, Mid wives and Health technicians | 113 | Hospital | Burn out, the study showed that burnout affected more than three quarters of our sample, 59.3% of them had high emotional exhaustion, 26.5% had high depersonalization and 41.6% had low personal accomplishment. |  |
| Stigmatization, psychological and emotional trauma among frontline healthcare workers treated for COVID-19 in Lagos State, Nigeria: a qualitative study | Ayi Vandi Kwaghe | 2021 | Nigeria | Qualitative study | Frontline health care workers | 12 | An isolation centre for the management of COVID-19 patients | Stigmatization, psychological and emotional trauma.The respondents were quite knowledgeable on COVID-19, their reactions when informed of their status were denial, anxiety, distress, disorientation, crying for fear of stigmatization, while some were psychologically prepared. Reactions from colleagues, family and friends were encouraging and provided solace for them with a few colleagues and families that had negative reactions. Challenges include anosmia, movement restriction, loneliness, worries about the state of their families, nondisclosure of status to family members, nonconducive isolation centre with limited space, insomnia, stigmatization by health workers at the isolation centre, extended duration of stay, delay in the release of test results and use of ambulance for evacuation to the isolation centres. Coping strategies were watching movies, phone calls, use of social media, listening to music, attending webinars, working on projects and reading spiritual books. Recommendations were early laboratory testing of samples and conveying of results, increase testing capacity, the need of health care workers to be more compassionate, better method of evacuation of people that tested positive to COVID-19, aside the use of ambulance that increases the likelihood of stigmatization and standard guideline for the case management of people recovering from COVID-19 in Lagos state | Facilitators: None |
| Stress, anxiety and depression among healthcare workers facing COVID-19 pandemic in Egypt: a cross section online study | Hebatalla Mohamed Aly | 2021 | Egypt | Cross sectional study | Physicians, dentists, pharmacists, physiotherapists, nurses, technicians and administrators | 262 | Community | Stress , anxiety and depression. Only 1.3% showed low perceived stress while  98.5% showed moderate to severe stress. About 9.5% did not experience generalised anxiety, while the remaining 90.5% had different degrees of anxiety as mild anxiety  showed the highest per cent affecting about 40% of participants followed by moderate anxiety about 32% then severe anxiety, 18.5%. With regard to depression, 94% of  participants showed mild to severe depression. |  |
| Substance use among healthcare professionals: A cross-sectional study in Kenya | Jasmit Shah | 2025 | Kenya | Cross-sectional survey study | Healthcare providers (HCPs): medical doctors/trainees, nurses, allied healthcare workers | 1,768 healthcare providers | Healthcare facilities across various counties in Kenya | Substance use is associated with depression, burnout, and decreased career satisfaction. Work stress suggested as a potential cause. | N/A (Cross-sectional study) | Barriers: HCPs are less likely to seek help due to embarrassment, fear of stigma, and fear of consequences. SUDs are difficult to detect due to high baseline functioning and denial tendencies. | Facilitators: N/A (Not explicitly stated) |
| Substance Use and Its Correlates among Healthcare Workers in a Teaching and Referral Hospital in South Western Kenya | E. M. Chepkoech | 2024 (April-June) | South Western Kenya (Teaching and Referral Hospital) | Cross-sectional descriptive study | Healthcare workers (HCPs): Doctors, Nurses, Clinical Officers, Pharmacists, Nutritionists, others | 239 healthcare workers | Moi Teaching and Referral Hospital (MTRH), Eldoret, Kenya | No specific mental health conditions identified, but stress/work pressure was cited as a major influence on substance use. | N/A (Cross-sectional study) | Barriers: N/A (Not an intervention study) | Facilitators: N/A (Not explicitly stated) |
| The effectiveness of assertiveness training program on psychological wellbeing and work engagement among novice psychiatric nurses | Enas Mahrous Abdelaziz | 2020 | Egypt | Quasi-experimental (one-group pre-test/post-test and follow-up) | Novice psychiatric nurses (less than 2 years of experience) | 70 | Al-Abbassia Mental Health Hospital, Cairo, Egypt | Psychological Well-being: Novice nurses faced low initial well-being due to the high-stress nature of psychiatric wards, emotional exhaustion, and heavy workloads. Work Engagement: Initial levels were low; however, the study found a significant positive correlation between assertiveness and both psychological well-being and work engagement. | Assertiveness Training Program: A psycho-educational intervention covering communication styles, assertive rights, and techniques for handling criticism and saying "no." |
| The prevalence of common mental disorders among healthcare professionals during the COVID-19 pandemic at a tertiary Hospital in Addis Ababa, Ethiopia | Hailu Abera Mulatu. | 2021 | Ethiopia | Cross-sectional study | Doctors, nurses/midwives, laboratory professionals and pharmacy professionals | 420 | Hospital, COVID-19 treatment units (frontline) and other hospital units (non-frontline) | Depression, Anxiety and Insomnia. A substantial proportion of HCWs experienced symptoms of depression, anxiety, insomnia and distress during the pandemic; frontline workers were at notably higher risk. Being married, undergraduate education and lower monthly income (≤USD 222) were independently associated with higher odds of certain adverse outcomes (e.g., married: higher depression; low salary: higher anxiety/insomnia). Authors recommend psychological interventions/support from hospital administration, improved shift logistics and accommodation/PPE support, and long-term surveillance and multi-site longitudinal research. |  |
| The pyschological impact of Covid 19 pandemic on south sudanese health workers in quarantine centres: a cross section study 2020-2021 | Malaz Hassan Dafaalla Idrees | 2020 - 2021 | South Sudan | Cross sectional study | Healthcare workers | 133 | Isolation centre | Depression, anxiety and burnout. One-hundred thirty-three healthcare workers of different job titles were enrolled in this study. A total of 54% were females, and 46% were males. Most of the participants had borderline depression (44%) or anxiety scores (47%). Females had significantly a higher mean anxiety score than males. There was no significant difference between participants with and without chronic disease on both anxiety and depression scores |  |
| The relationship between team burn out and team psychological saftey and civility among hospital nurses during the covide 19 pandemic: the mediating role of team thriving | Hannah Vivian Osei | 2021 | Ghana | A cross-sectional study | Nurses | 447 | Three government hospitals | Burn out. Results highlighted that a negative relationship exists between team burnout and team psychological safety and also between team burnout and individual civility. Team thriving was found to mediate the relationship between team burnout and civility. |  |
| The repercussions of burnout among health care professionals in medical oncology in tunisia | A. Daldoul | 2021 | Tunisia | Cross-sectional study | Doctors (53%) and nurses (47%). | 70 | Public hospitals in Tunisia | Burnout: Found in 21% of participants. High Emotional Exhaustion: 63% of participants. High Depersonalization: 53% of participants. Low Personal Achievement: 59% of participants. Associated repercussions included: Sadness, sleep disturbances, unexplained pain, fatigue, addictive behaviors, irritability, guilt, suicidal thoughts, and absenteeism. The study highlights that burnout in medical oncology is a significant threat to the quality of patient care. Global burnout was significantly associated with guilt, unexplained pain, fatigue, addictive and avoidance behaviors, suicidal thoughts, absenteeism, and the use of psychotropic drugs. Female sex and night work were identified as significant predisposing factors for burnout. | None. |
| The role of emotional intelligence and organisational support on work stress of nurses in Ibadan, Nigeria | Abiodun M. Lawal | 2017 | Nigeria | Cross-sectional survey research design | Nurses | 228 | University teaching hospital | Work stress, with the sampled nurses reporting a moderate level of work stress (M=22.27) Key findings were that others' emotion appraisal, use of emotion, and perceived organisational support had independent relationships with work stress. |  |
| Training Peers to Treat Ebola Centre Workers with Anxiety and Depression in Sierra Leone | Samantha Waterman | 2018 | Sierra Leone | Feasibility and effectiveness study (pre-test/post-test design) | Ex-Ebola Treatment Centre (ETC) staff including nurses, hygienists, sprayers, and support staff | 247 (Initial participants); 149 (Post-intervention sample) | Community-based settings across Sierra Leone (Freetown, Kerry Town, Port Loko, and Makeni) | Depression & Anxiety: 74% of participants initially scored in the moderate to severe range for depression (PHQ-9) and 60% for anxiety (GAD-7). PTSD: High initial symptomology (PCL-C scores) related to the trauma of the Ebola outbreak and high mortality rates among colleagues. | A 3-phased, CBT-based group intervention delivered by trained peers. Phases included: 1) Engagement and Psychoeducation; 2) Specific CBT Skills (e.g., relaxation, problem-solving, cognitive restructuring); and 3) Relapse Prevention. | Barriers: High Attrition: 40% dropout rate due to participants finding new employment or relocating. Logistics: Difficulty in coordinating sessions around work schedules. Emotional Weight: Peers initially struggled with the emotional burden of hearing colleagues' traumas. | Facilitators: Shared Experience: The "peer" aspect facilitated trust and lowered stigma. Task-shifting: Successful training of non-specialists to deliver complex CBT interventions with supervision. Incentives: Providing travel reimbursements and certificates helped retention. |
| Work-related burnout and its associated factors among midwives working at public hospitals in northwest Ethiopia: a multi-centered study | Berihun Agegn Mengistie | 2022 | Ethiopia | Cross-sectional study | Mid wives | 663 | Helath facilities | Burn out. This study found a significant level of workrelated burnout among midwives working in public hospitals. Experiencing workplace violence, a job rotation of less than or equals to six months, working hours over 60  h a week, good superior support, exposure to blood and body fluids or needle stick injuries and experiencing stress were significant factors that influenced work-related burnout. |  |
| Work-related stress, burnout, and related sociodemographic factors among nurses | Ifeyinwa O | 2018 | Nigeria | Cross-sectional correlational study | Nurses | 393 | Randomly selected hospitals in Southeast Nigeria | The study examined work-related stress and burnout in nurses and related sociodemographic factors. Among the sociodemographic factors examined, only sex was found to be significantly associated with work-related stressimplies that stress-burnout management interventions for nursing professionals in Southeast Nigeria need to be gender transformative. |  |
